# Supplementary material for: Calcineurin inhibitors cyclosporin A and tacrolimus protect against podocyte injury induced by puromycin aminonucleoside in rodent models
Source: PubMed Central journal article supplement (PMC5007516; doi:10.1038/srep32087), 2016-09-01
Supplement: srep32087-s1.pdf [file srep32087-s1.pdf]

## Supplement Information

### **Calcineurin inhibitors cyclosporin A and tacrolimus protect against podocyte injury induced by puromycin aminonucleoside in rodent models**

Xiujin Shen<sup>1#</sup>, Hong Jiang<sup>1#,\*</sup>, Meike Ying<sup>1</sup>, Zhoutao Xie<sup>1</sup>, Xiayu Li<sup>1</sup>, Haibing Wang<sup>2</sup>, Jie Zhao<sup>1</sup>, Chuan Lin<sup>1</sup>, Yucheng Wang<sup>1</sup>, Shi Feng<sup>1</sup>, Jia Shen<sup>1</sup>, Chunhua Weng<sup>1</sup>, Weiqiang Lin<sup>1</sup>, Huiping Wang<sup>1</sup>, Qin Zhou<sup>1</sup>, Yan Bi<sup>1</sup>, Meng Li<sup>1</sup>, Lingyan Wang<sup>3</sup>, Tongyu Zhu<sup>4</sup>, Xiaoru Huang<sup>5</sup>, Hui-Yao Lan<sup>5</sup>, Jing Zhou<sup>6</sup>, Jianghua Chen<sup>1\*</sup>

<sup>1</sup>Kidney Disease Center, First Affiliated Hospital, Zhejiang University, School of Medicine; Key Laboratory of Nephropathy, Zhejiang Province, Hangzhou, Zhejiang, China, <sup>2</sup>National Clinical Research Base of Traditional Chinese Medicine, Zhejiang Hospital of Traditional Chinese Medicine, Zhejiang Chinese Medical University, Hangzhou, China, <sup>3</sup>Biomedical Research Center, Zhongshan Hospital, Fudan University, Shanghai, China, <sup>4</sup>Department of Urology, Zhongshan Hospital, Fudan University, Shanghai, China, <sup>5</sup>Li Ka Shing Institute of Health Sciences, and Department of Medicine and Therapeutics, The Chinese University of Hong Kong, Hong Kong, China, <sup>6</sup>Harvard Center for Polycystic Kidney Disease Research and Renal Division, Department of Medicine, Brigham and Women's Hospital, Harvard Medical School, Boston, USA.

<sup>#</sup>These authors contributed equally to this work.

\*Corresponding author email: [annie.jh@163.com](mailto:annie.jh@163.com), [chenjianghua@zju.edu.cn](mailto:chenjianghua@zju.edu.cn)

## Figure legends

**Fig S1. Effects of CsA and FK506 on podocyte viability in cultured mouse podocytes *in vitro*.** (A) MTT assays of podocytes treated with CsA or FK506 alone for 24 h. (B) Immunofluorescence of synaptopodin and podocin in cultured mouse podocytes after CsA and FK506 treatment.

**Fig S2. PAN disrupts the podocyte cytoskeleton in cultured mouse podocytes *in vitro*.** (A) Immunofluorescence of F-actin showed that PAN disrupted the podocyte cytoskeleton. The green fluorochrome was FITC-phalloidin. Original magnification,  $\times 200$ . (B) Western blot analysis of synaptopodin and podocin levels in PAN-treated podocytes.

**Fig S3. PAN increases apoptosis-related proteins in cultured mouse podocytes *in vitro*.** Western blot analysis of Bax, Bcl-XL, BCL-2 (A), and caspase-family protein (B) expression after stimulation with 25  $\mu\text{g/ml}$  and 50  $\mu\text{g/ml}$  PAN for 24 h.

**Fig S4. Effects of PAN, CsA, and FK506 on p38, ERK, and JNK signaling pathways in cultured mouse podocytes *in vitro*.** Western blot analysis of p38, ERK, and JNK signaling pathways in PAN, CsA, and FK506-treated podocytes.

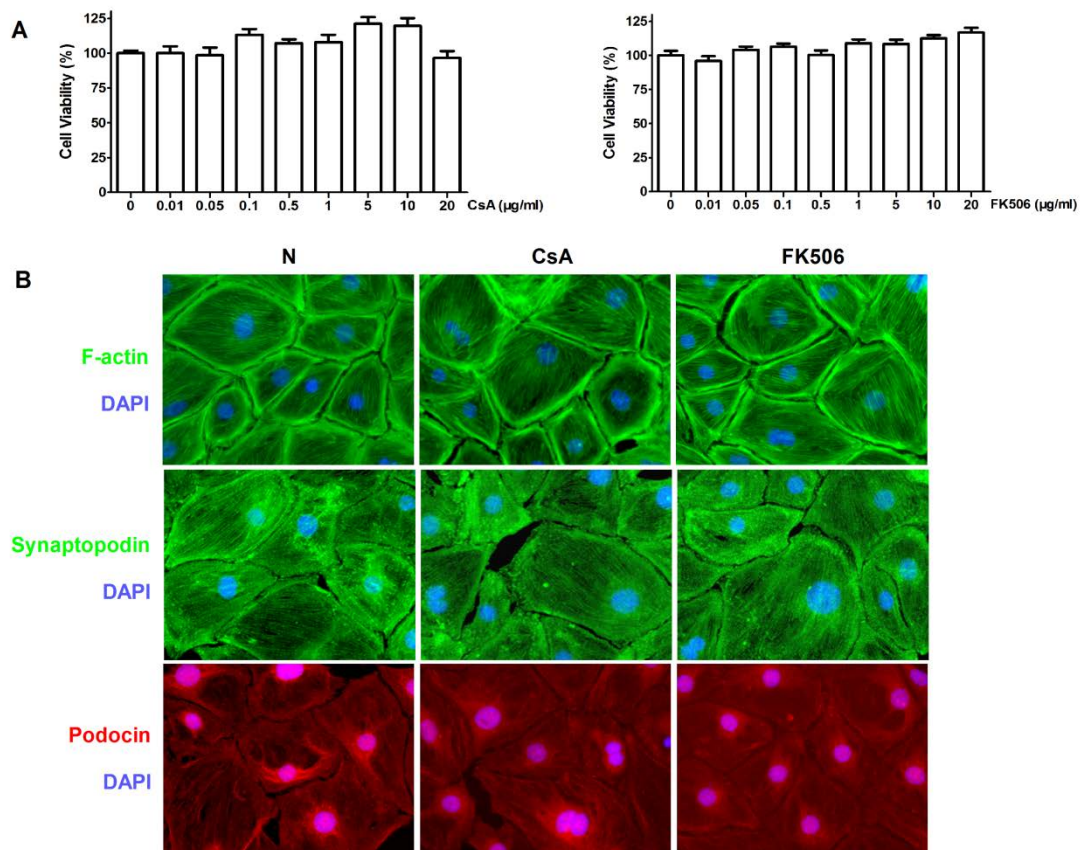

**Fig S1. Effects of CsA and FK506 on podocyte viability in cultured mouse podocytes *in vitro*.** (A) MTT assays of podocytes treated with CsA or FK506 alone for 24 h. (B) Immunofluorescence of synaptopodin and podocin in cultured mouse podocytes after CsA and FK506 treatment.

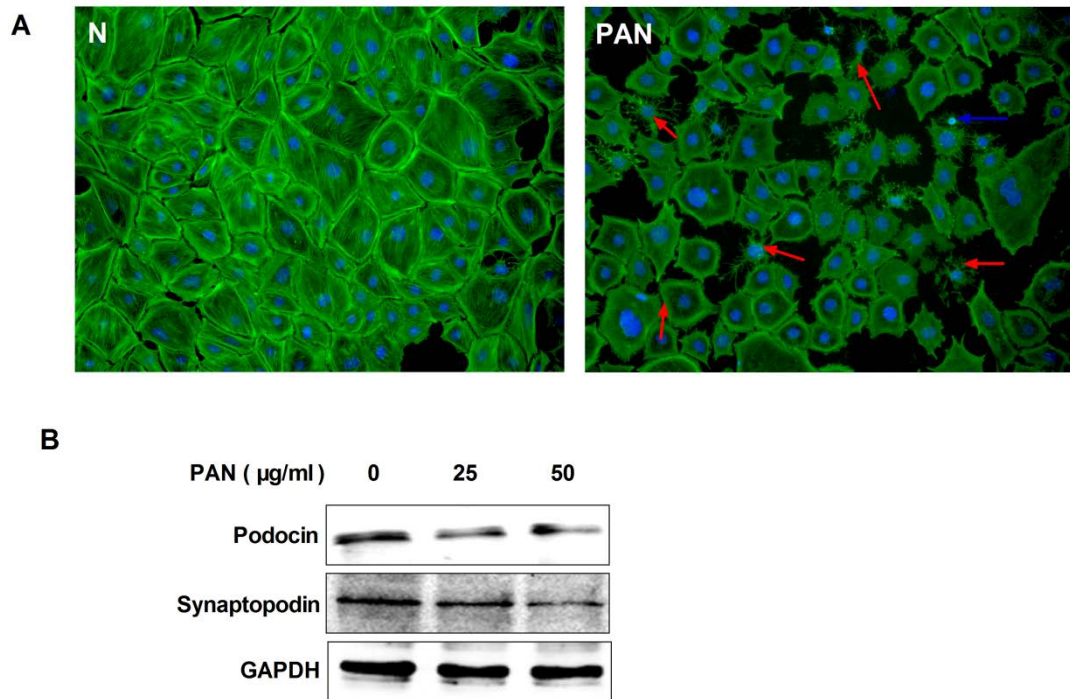

**Fig S2. PAN disrupts the podocyte cytoskeleton in cultured mouse podocytes *in vitro*.** (A) Immunofluorescence of F-actin showed that PAN disrupted the podocyte cytoskeleton. The green fluorochrome was FITC-phalloidin. Original magnification,  $\times 200$ . (B) Western blot analysis of synaptopodin and podocin levels in PAN-treated podocytes.

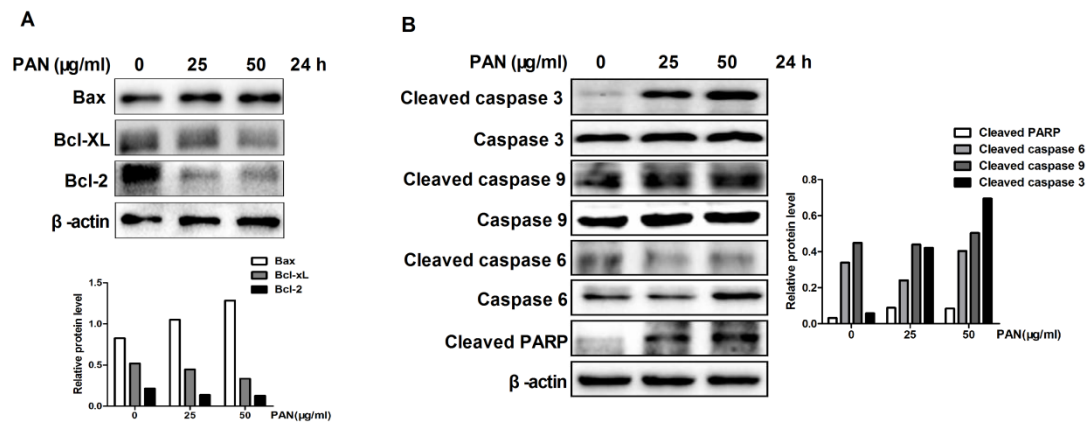

**Fig S3. PAN increases apoptosis-related proteins in cultured mouse podocytes *in vitro*.** Western blot analysis of Bax, Bcl-XL, BCL-2 (A), and caspase-family protein (B) expression after stimulation with 25  $\mu\text{g/ml}$  and 50  $\mu\text{g/ml}$  PAN for 24 h.

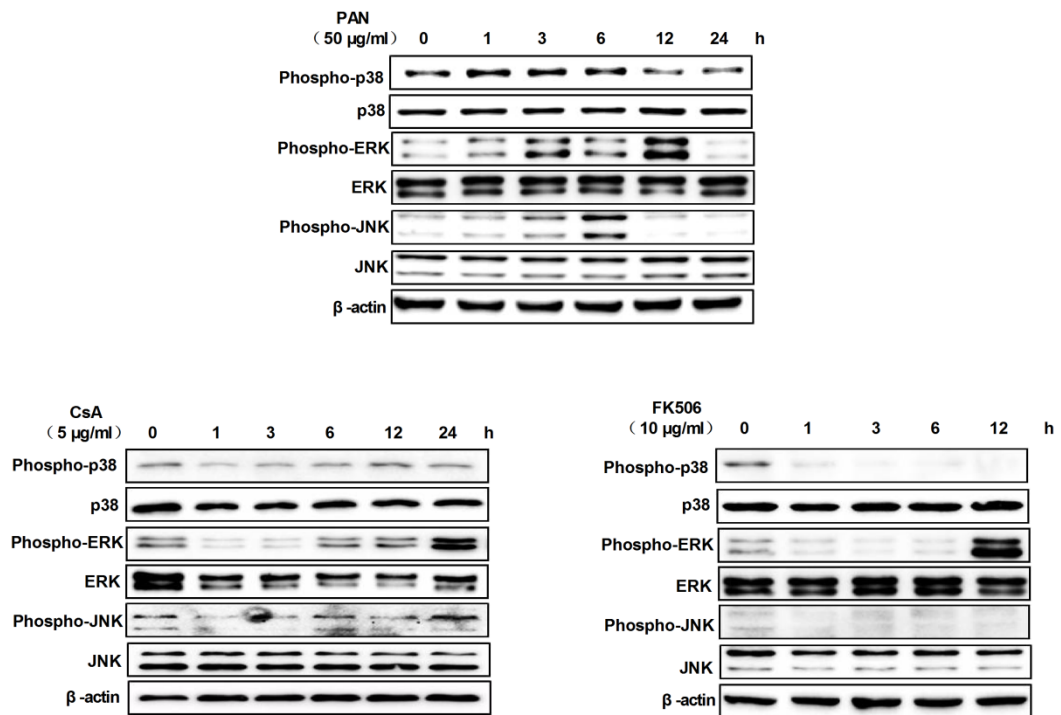

**Fig S4. Effects of PAN, CsA, and FK506 on p38, ERK, and JNK signaling pathways in cultured mouse podocytes *in vitro*.** Western blot analysis of p38, ERK, and JNK signaling pathways in PAN, CsA, and FK506-treated podocytes.

**Table S1**

| <b>Primary antibodies</b> | <b>Host</b> | <b>Dilution and supplier</b>                                | <b>Product ID</b> | <b>Application</b> |
|---------------------------|-------------|-------------------------------------------------------------|-------------------|--------------------|
| ERK                       | Rabbit      | 1:1000; Cell Signaling, Danvers, MA                         | 4695              | WB                 |
| phospho-ERK               | Rabbit      | 1:1000; Cell Signaling, Danvers, MA                         | 4370              | WB                 |
| JNK                       | Rabbit      | 1:1000; Cell Signaling, Danvers, MA                         | 9258              | WB                 |
| phospho-JNK               | Rabbit      | 1:1000; Cell Signaling, Danvers, MA                         | 4668              | WB                 |
| p38                       | Rabbit      | 1:1000; Cell Signaling, Danvers, MA                         | 8690              | WB                 |
| phospho-p38               | Rabbit      | 1:1000; Cell Signaling, Danvers, MA                         | 4511              | WB                 |
| Bcl-2                     | Rabbit      | 1:1000; Cell Signaling, Danvers, MA                         | 2870              | WB                 |
| Bcl-xl                    | Rabbit      | 1:1000; Cell Signaling, Danvers, MA                         | 2764              | WB                 |
| Bax                       | Rabbit      | 1:1000; Cell Signaling, Danvers, MA                         | 2772              | WB                 |
| caspase-3                 | Rabbit      | 1:1000; Cell Signaling, Danvers, MA                         | 9662              | WB                 |
| cleaved caspase-3         | Rabbit      | 1:1000; Cell Signaling, Danvers, MA                         | 9664              | WB                 |
| caspase-6                 | Rabbit      | 1:1000; Cell Signaling, Danvers, MA                         | 9762              | WB                 |
| cleaved caspase-6         | Rabbit      | 1:1000; Cell Signaling, Danvers, MA                         | 9761              | WB                 |
| caspase-9                 | Rabbit      | 1:1000; Cell Signaling, Danvers, MA                         | 9504              | WB                 |
| cleaved caspase-9         | Rabbit      | 1:1000; Cell Signaling, Danvers, MA                         | 9509              | WB                 |
| cleaved PARP              | Rabbit      | 1:1000; Cell Signaling, Danvers, MA                         | 9544              | WB                 |
| desmin                    | Mouse       | 1:60; Zhongshan Golden Bridge Biotechnology, Beijing, China | ZM0091            | IHC                |
| WT-1                      | Mouse       | 1:80; Zhongshan Golden Bridge Biotechnology, Beijing, China | ZM0269            | IHC                |
| Synaptopodin              | Goat/Rabbit | 1:100/1:1000; Santa Cruz, Dallas, TX                        | SC-21537/SC50459  | IF/WB              |
| podocin                   | Rabbit      | 1:100/1:1000; Sigma, St Louis, MO, USA                      | P0372             | IF/WB              |
| CaN                       | Rabbit      | 1:1000; Santa Cruz, Dallas, TX                              | SC-9070           | WB                 |
| $\beta$ -actin            | Mouse       | 1:5000; Abcam, Cambridge, MA                                | Ab6276            | WB                 |
